# Supplementary material for: Effect of plateau pikas disturbance and patchiness on ecosystem carbon emission of alpine meadow on the northeastern part of Qinghai-Tibetan Plateau
Source: Copernicus journal article supplement (doi:10.5194/bg-2018-296), 2018-07-20

Response to Anonymous Referee #1's comments:

General comments: The plateau pika (*Ochotona curzoniae*) is one of the main native soil faunas on the Qinghai-Tibet Plateau and plays a key role in the terrestrial ecosystem there. Previous studies have mainly focused on its active habits and the influence of population density on soil properties, plant communities, and so on. On contrast, the present study aims to study the effect of plateau pika disturbance and patchiness on ecosystem carbon emission at the plot scale (i.e. large bald patch, medium bald patch, small bald patch, intact grassland, above pika tunnel and pika pile). The results are critical for ecological restoration and environmental change on the Qinghai-Tibetan Plateau.

Our reply: We appreciate your positive comments. We have accepted all of the your suggestions and explained how we had revised the manuscript point by point.

Specific comments:

(1) Introduction: This section has not clarified clearly why we should study the effect of plateau pika disturbance and patchiness on ecosystem carbon emission at the plot scale, but not at other scales? What are the exact differences between this study and so many previous studies?

Our reply: Thank you for your careful review. We have revised the whole manuscript to eliminate the reader's confusion. In fact, we mainly focused on the effect of plateau pika disturbance and patchiness on ecosystem carbon emission of alpine meadow and we did not refer to any scales in this work. We have clarified clearly why we should study the effect of plateau pika disturbance and patchiness on alpine grassland at plot scale in our previous study (Yi et al., 2016).

Typically, most of the previous studies compared carbon fluxes under intact vegetation at plots with different number of pika burrows. However, ecosystem carbon emissions from the homogeneous land surface induced by pika piles and patchiness have yet to be quantified. These are the exact differences between this study and so many previous studies. We have revised this section as follow (Line 86-90).

“Previous studies have demonstrated that pikas disturbance and patchiness weaken the function of alpine meadow as a carbon sink (Liu et al., 13; Peng et al., 2015; Qin et al., 2018) and accelerated ecosystem carbon emission rate (Qin et al., 2015a). Nevertheless, most of these studies have mainly focused on ecosystem carbon emission rate under the homogeneous land surface rather than heterogeneous land surfaces.”

Yi, S., Chen, J., Qin, Y., Xu, G.: The burying and grazing effects of plateau pika on alpine grassland are small: a pilot study in a semiarid basin on the Qinghai-Tibet Plateau, *Biogeosciences*, 13(22), 6273-6284, 2016.

(2) Materials and methods: Line 114-118: Is there any standard to distinguish the six representative underlying surfaces? Especially how to determine the threshold area for the division of large, medium and small bald patches (i.e. 9 m<sup>2</sup> and 1 m<sup>2</sup>)?

Our reply: Thank you for your careful review. Six representative underlying surfaces were selected according to the previous work in our study site (Yi et al., 2016; Qin et al., 2018). They were distinguished easily in aerial photographs. Large bald patches had less vegetation cover and the smallest side was larger than 3 m. Medium patches also covered by less vegetation cover and the larger side was in a range of 1 to 3 m and small bald patches were characteristic by less vegetation cover and the larger side was less than 1 m. Intact grassland was characteristic by high vegetation cover and no large and medium bare land was found. Pika tunnel and pika pile usually co-existed. Pika tunnel is approximately 6 cm in diameter and pika pile is in the front of pika tunnel, 60 cm in diameter and less vegetation cover.

We calculated the threshold area of large, medium and small patches by aerial photograph. Each aerial photograph has 12 million pixels. At a height of 20 m, the resolution of each pixel is ~1 cm and each photograph covers ~26 m × 35 m of ground. Pixels in each aerial image were first classified into two groups, i.e. vegetated or bare patches (Yi, 2016). Then patches with different sizes were created using OpenCv Library. And finally, fractions of vegetation and bare patches (large, medium and small patches) were calculated. We revised this part as follow (Line 114-118).

“At early June 2016, three 100 m × 100 m plots were established as replicates. In each plot, six representative land surfaces were selected: (1) large bald patch with size larger than 9.0 m<sup>2</sup> (LP), (2) medium bald patch with size of 1.0-9.0 m<sup>2</sup> (MP), (3) small bald patch with size of less than 1.0 m<sup>2</sup> (SP), (4) intact grassland patch (IG), (5) above pika tunnel (PT), (6) old pika pile (PP) (Figure 1) (Yi et al., 2016; Qin et al., 2018).”

Yi, S.H., 2016. FragMAP: a tool for long-term and cooperative monitoring and analysis of small-scale habitat fragmentation using an unmanned aerial vehicle. *Int. J. Remote Sens.* 1-12. <http://dx.doi.org/10.1080/01431161.2016.1253898>.

Yi, S., Chen, J., Qin, Y., Xu, G.: The burying and grazing effects of plateau pika on alpine grassland are small: a pilot study in a semiarid basin on the Qinghai-Tibet Plateau, *Biogeosciences*, 13(22), 6273-6284, 2016.

Qin, Y., Yi, S., Ding, Y., Xu, G., Chen, J., Wang, Z.: Effects of small-scale patchiness of alpine grassland on ecosystem carbon and nitrogen accumulation and estimation in northeastern qinghai-tibetan plateau, *Geoderma*, 318, 52-63, 2018.

(3) Line 124-136: Were the soil temperature and moisture measured at all three 100 m × 100 m plots or only one 100 m × 100 m plots?

Our reply: Thank you for your question. Soil temperature and moisture were measured in one 100 m × 100 m plot where ecosystem respiration was measured. Both soil temperature and moisture were measured with three replicates under each underlying surface type. We revised this part to eliminate the confusion (Line 124-127).

“Soil temperature and moisture at 10 cm were measured in a 100 m × 100 m plot where ecosystem respiration was measured by using an auto-measurement system (Decagon Inc., USA) from early June to the late August. The system consisted of an EM50 logger and five 5TM sensors. The data were logged automatically every 30 min”

(4) Were the soil saturated hydraulic conductivity, soil hardness and ecosystem respiration rates measured for only one time or many times during the study periods?

These key questions should be clarified.

Our reply: Thanks for your suggestion. Soil saturated hydraulic conductivity and soil hardness under each surface type were measured one time every month from June to August. Ecosystem respiration was measured every 7-10 days from June 16 to August 20 depending on weather conditions. We therefore revised this part as follow (Line 124-155).

“Soil temperature and moisture at 10 cm were measured in a 100 m × 100 m plot where ecosystem respiration was measured by using an auto-measurement system (Decagon Inc., USA) from early June to the late August. The system consisted of an EM50 logger and five 5TM sensors. The data were logged automatically every 30 min. Soil saturated hydraulic conductivity and compactness were measured once each month from June to August. Soil saturated hydraulic conductivity was measured by Dual Head infiltrometer (Decagon Inc., USA). The measurement process included 15 min soak time, 20 min hold time at low pressure head (5 cm) and high pressure head (15 cm) with 2 cycles. Each measurement takes 95 min altogether. Soil compactness was measured with TJSJ-750 (Hangzhou Top Instrument co., LTD, Hangzhou, China) from the soil surface to 10 cm depth. Ecosystem respiration rates were measured using the LICOR-8150 Automated Soil CO<sub>2</sub> Flux System, which was an accessory for the LI-8100A with at most 8 individual chambers at one time. Ecosystem CO<sub>2</sub> emission was sampled and controlled by the LI-8100A Analyzer Control Unit. The air temperature inside of the chamber was measured using the internal thermistor of the chamber. The ecosystem CO<sub>2</sub> fluxes were calculated by the equation as follow.

$$F_c = \frac{10VP_0 \left(1 - \frac{W_0}{1000}\right)}{RS(T_0 + 273.15)} \frac{\partial C'}{\partial t}$$

where  $F_c$  is the soil CO<sub>2</sub> efflux rate ( $\mu\text{mol m}^{-2} \text{s}^{-1}$ ),  $V$  is volume ( $\text{cm}^3$ ),  $P_0$  is the initial pressure (kPa),  $W_0$  is the initial water vapor mole fraction ( $\text{mmol mol}^{-1}$ ),  $S$  is soil surface area ( $\text{cm}^2$ ),  $T_0$  is initial air temperature ( $^{\circ}\text{C}$ ), and  $\partial C'/\partial t$  is the initial rate of change in water-corrected CO<sub>2</sub> mole fraction ( $\mu\text{mol}^{-1} \text{mol s}^{-1}$ ).

Six LICOR-8100-104 long-term opaque chambers (20cm in diameter LICOR, Inc., Lincoln, NE, USA) were used to measure alternately between three replicates for

six land surface types. Therefore, 3 days at least were required to complete one rotation measurements of ecosystem respiration. To measure ecosystem respiration, eighteen polyvinyl chloride collars with a 20 cm inner diameter and a 12 cm height were inserted into the soil with 3-4 cm exposed to the air (Qin et al., 2013). All of the collars were installed at least 24 h before the first measurement to reduce disturbance-induced ecosystem CO<sub>2</sub> effluxes. Ecosystem respiration rates were measured every 7-10 days from June 16 to August 20 in 2016 depending on weather conditions. A round-the-clock measurement protocol was carried out and ecosystem respiration rates were measured every 30 minutes. Each measurement takes 1 minute and 45 seconds, including pre-purge 10 seconds, dead band 15 seconds, observation length 1 minute and post-purge 20 seconds.”

(5) Line 138-141: How depth was the pika tunnel? Did this depth limit the collection of soil core to 40 cm?

Our reply: Thanks for your question. We investigated pika tunnel by digging soil pole and the depth of pika tunnel was about 40cm. Therefore, it wasn't difficulty to collect soil core at depth of 40cm. We have revised this part as follow (Line 157-164). “Soil samples were collected during the periods of late July to early August 2016. In each surface type of each plot, five soil cores were collected using a stainless-steel auger (5 cm in diameter) at depths of 0-10, 10-20, 20-30 and 30-40 cm, and bulked as one composite sample for each depth in each quadrat. Another five soil cores were sampled by cylindrical cutting ring (7 cm in diameter and 5.2 cm in depth) to determine soil bulk density from each land surface type. Pika tunnel was approximate 6 cm in diameter and 40 cm in depth. Therefore, soil samples were available to collect at depth of 40cm. Totally, 512 soil samples were collected.”

(6) Discussion: Line 216-217: “Nevertheless, the increased water infiltration was unable to increase soil moisture under pika pile.” Why? The potential reasons should be discussed.

Our reply: Thanks for your suggestion. We discussed the reason why the increased water infiltration was unable to increase soil moisture under pika pile as follow (Line 263-271).

“Nevertheless, the increased water infiltration was unable to increase soil moisture under pika piles. For example, soil moisture under pika piles was approximate 5 % lower than intact grassland (Figure 4). Our result was discrepant with previous studies which reported old pika mound had the highest soil moisture during the summer (Ma et al., 2018) and moderate pika burrowing activities increased surface soil moisture (Li and Zhang, 2006). This difference may be contributed to the high pika density in alpine meadow (Guo et al, 2017). Moreover, pika piles were loose (Figure 6) with less vegetation cover (Figure 8), which was not beneficial for soil moisture storage.”

(7) Line 227-229: The explanation for the low soil moisture under bald patches was not convincing, because the vegetation transpiration at intact grassland may be higher than the corresponding soil evaporation under bald patches at the same periods.

Our reply: Thanks for your comment. In fact, we have measured evaporation under different surfaces of the intact grassland, isolate grassland, large patches, medium patches and small patches since the early June 2016. It is difficult to measure evaporation from pika tunnel and pika pile due to their small sizes. Therefore, these data were not presented in this manuscript. We found that the evaporation under bald patches were higher than the intact grassland in our study sites through three years observation. We have revised this part as follow (Line 288-297).

“Our results showed that soil moisture under large and medium patches decreased 10 % than intact grassland (Figure 4). Previous studies had reported that the soil compaction of bald patches decreased the rate of water infiltration (Wuest et al., 2006; Wilson and Smith, 2015), which was similar with our results showed that bald patches had less saturated soil hydraulic conductivity (Figure 5). Low vegetation cover under bald patches was not beneficial for water retention and utilization, where most of soil water was mainly lost as a way of evaporation (Yi et al., 2014). We have measured evaporation of the intact grassland, isolate grassland, large patches, medium patches and small patches since the early June 2016. Three years results indicated that evaporation under bald patches were higher than the intact grassland (data were not shown here).”

(8) Line 230-233: More details about the reason for the different soil temperature patterns should be added.

Our reply: Thank you for your suggestion. We have added more detailed information about the difference of soil temperature between intact grassland and pika pile and bald patches. This part has been revised as follow (Line 301-309).

“Our results indicated that soil temperature under pika piles and bald patches was approximate 1 to 3 °C higher than intact grassland (Figure 4), which mainly resulted from the heterogeneity of surface albedo, surface soil water retention, heat conduction properties and radiation (Beringer et al., 2005; Pielke, 2005; Yi et al., 2013; You et al., 2017). It was suggested that pikas disturbance create a better soil temperature buffer for them to avoid the extreme cold in winter (Ma et al., 2018), whereas high soil temperature under bald patch was a disadvantage for the recovery of vegetation because patch surface had the smallest soil moisture content (Figure 4) and the largest daily range of soil temperature (Ma et al., 2018).”

(9) Line 234-235: What is the reason for the description of “high soil temperature under bald patch was a disadvantage for the recovery of vegetation”?

Our reply: Thank you for your question. Our study site belongs to semi-arid region, where water was one of dominant limit factors for vegetation growth. Patch surface had the smallest soil moisture content and the largest daily range of soil temperature, which was not beneficial for soil water retention. We have changed this part as follow (Line 305-309).

“It was suggested that pikas disturbance create a better soil temperature buffer for them to avoid the extreme cold in winter (Ma et al., 2018), whereas high soil temperature under bald patch was a disadvantage for the recovery of vegetation because patch surface had the smallest soil moisture content (Figure 4) and the largest daily range of soil temperature (Ma et al., 2018).”

Ma, Y.J., Wu, Y.N., Liu, W.L., Li, X.Y., Lin, H.S.: Microclimate response of soil to plateau pika's disturbance in the northeast qinghai-tibet plateau, *European Journal of Soil Science*, 69(2), 232-244, 2018.

Technical corrections:

(1) Line 33: Delete “under”.

Our reply: Thank you for your suggestion. We have deleted “under” according to your suggestion.

(2) Line 88-90: This sentence is not exact, because lots of previous researches have studied the heterogeneous underground vegetation and belowground soil properties.

Our reply: Thank you for your suggestion. We totally agree with your comment that lots of previous researches have studied the heterogeneous underground vegetation and belowground soil properties. However, few studies have investigated the difference of ecosystem respiration under the heterogeneous underlying surface. Therefore, we have changed this sentence to “Nevertheless, most of these studies have mainly focused on ecosystem carbon emission rate under the homogeneous land surface rather than heterogeneous land surfaces.” (Line 88-90)

(3) Line 188-189: This sentence has the same mean with the sentence in line 185-186.

Our reply: Thank you for your suggestion. We have deleted this sentence according to your suggestion.

(4) Line 197-198: According to the description in line 172, the growing season in the study is from May to September. Please add the data about ecosystem respiration in May and September.

Our reply: Thank you for your suggestion. Actually, our field observation started at the early June and finished at the late August in 2016. It's pity we can't add the data of ecosystem respiration in May and September.

(5) Line 214: Change “Figure 3” to “Figure 4”.

Our reply: Thank you for your suggestion. We have changed “Figure 3” to “Figure 4” according to your suggestion.

(6) Line 311: Some references cited in the text were not listed in the “Reference” section.

Our reply: Thank you for your suggestion. The references have been checked carefully through manuscript according to your suggestion. And now all the references cited in the manuscript are also included in the “Reference” section.



(7) Line 518-520: Six small photos below the aerial photo are not clear. Moreover, add “MP” after “2”.

Our reply: Thank you for your suggestion. We have redrawn Figure 1 according to your suggestion. We also add “MP” after “2”. We believe that the photos are clear now.

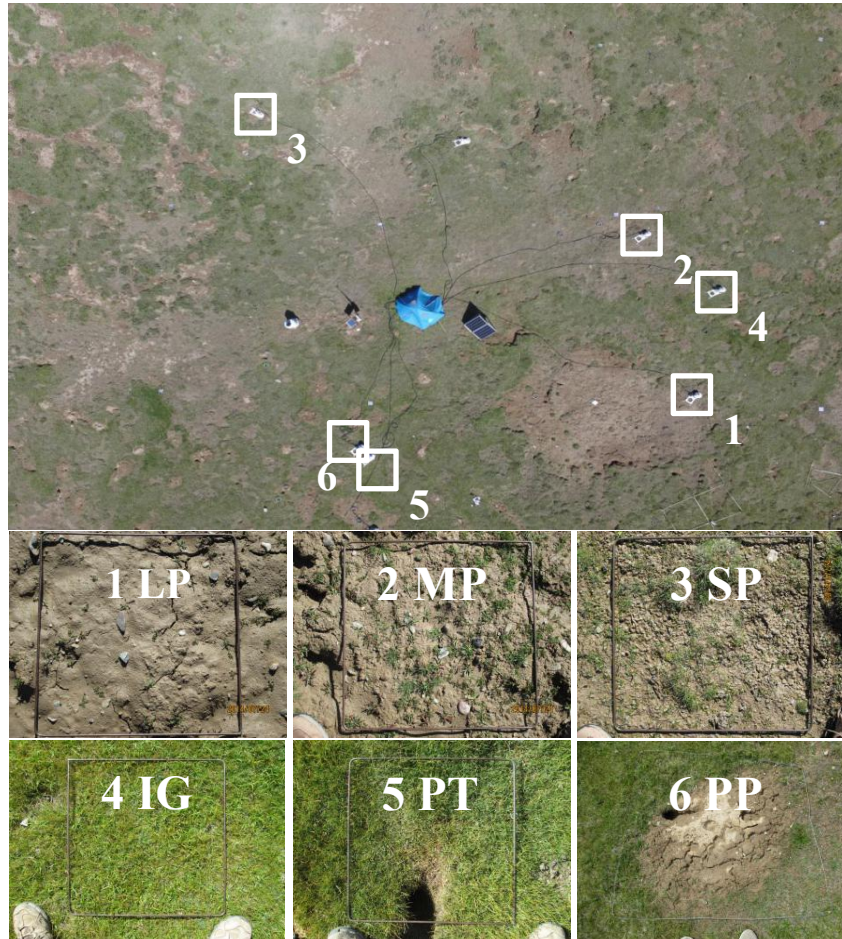

Figure 1. An aerial photo of field observation of ecosystem respiration at six surface types: (1) Large bald patch (LP), (2) Medium bald patch (MP), (3) Small bald patch (SP), (4) Intact grassland patch (IG), (5) above pika tunnel (PT) and (6) old Pika pile (PP).

(8) Line 539: The regression analysis was used to analyze the relationships of ecosystem respiration with biotic and abiotic factors (line 168-169). However, the result in figure 9 was only the correlation coefficient between them.

Our reply: Thank you for your suggestion. We have redrawn Figure 9 according to your suggestion and now it contained both the correlation coefficients and P value in one figure. The title of Figure 9 was changed to “Figure 9. The correlation coefficient

charts between ecosystem respiration (Re) and biotic and abiotic factors for all six land surfaces. The diagonal line in the figure shows the distributions of the variables themselves. The lower triangle (the left bottom of the diagonal) in the figure shows scatter plots of the two properties. The upper triangle (the upper right of the diagonal) in the figure indicates the correlation values of the two parameters; the asterisk indicates the degree of significance (\*\*\*) indicates significant differences at  $P < 0.001$ , \* indicates significant differences at  $P < 0.01$ , \* indicates significant differences at  $P < 0.05$ ). The bold bigger numbers mean the higher correlation.”

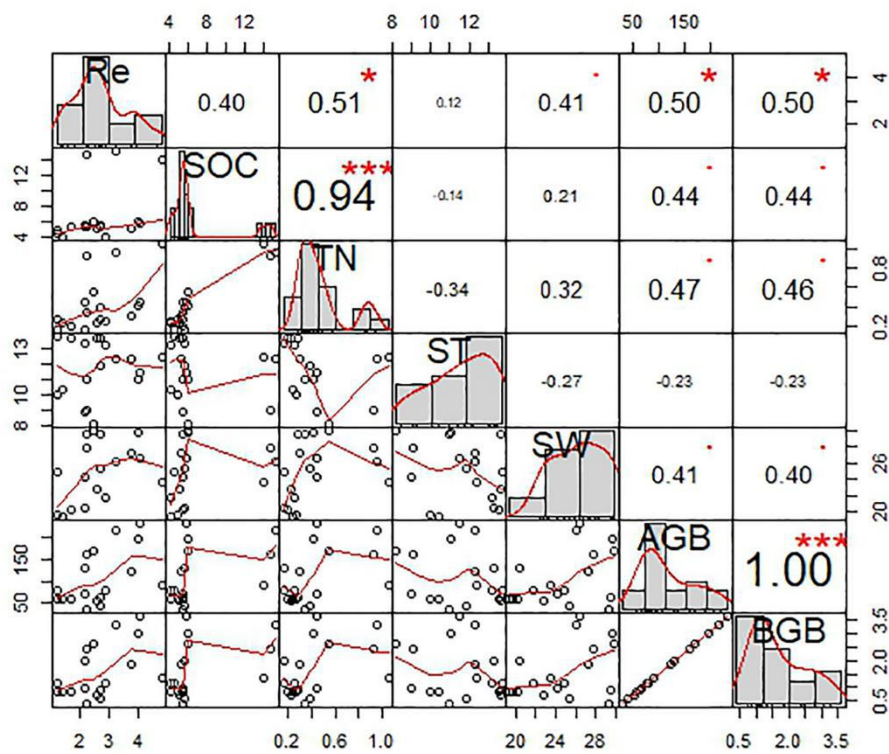

Figure 9. The correlation coefficient charts between ecosystem respiration (Re) and biotic and abiotic factors for all six land surfaces. The diagonal line in the figure shows the distributions of the variables themselves. The lower triangle (the left bottom of the diagonal) in the figure shows scatter plots of the two properties. The upper triangle (the upper right of the diagonal) in the figure indicates the correlation values of the two parameters; the asterisk indicates the degree of significance (\*\*\*) indicates significant differences at  $P < 0.001$ , \* indicates significant differences at  $P < 0.01$ , \* indicates significant differences at  $P < 0.05$ ). The bold bigger numbers mean the higher correlation.

1 **Effect of plateau pikas disturbance and patchiness on ecosystem carbon emission of**  
2 **alpine meadow on the northeastern part of Qinghai-Tibetan Plateau**

3 Yu Qin<sup>1</sup>, Shuhua Yi<sup>2, 1\*</sup>, Yongjian Ding<sup>1, 3</sup>, Wei Zhang<sup>1, 3</sup>, Yan Qin<sup>1, 3</sup>, Jianjun Chen<sup>4,5</sup>, Zhiwei  
4 Wang<sup>1,6</sup>

5 1. State Key Laboratory of Cryospheric Sciences, Northwest Institute of Eco-Environment  
6 and Resources, Chinese Academy of Sciences, 320 Donggang West Road, Lanzhou 730000,  
7 China

8 2. School of Geographic Sciences, Nantong University, 999 Tongjing Road, Nantong, Jiangsu,  
9 226007, China

10 3. University of the Chinese Academy of Sciences, No.19A Yuquan Road, Beijing 100049,  
11 China

12 4. College of Geomatics and Geoinformation, Guilin University of Technology, 12 Jiangan Ro  
13 ad, Guilin, 541004, China

14 5. Guangxi Key Laboratory of Spatial Information and Geomatics, 12 Jiangan Road, Guilin, 5  
15 41004, China

16 6. Guizhou Institute of Prataculture, Guizhou Academy of Agricultural Sciences, Guiyang,  
17 550006, People's Republic of China

18 \* E-mail: yis@lzb.ac.cn

19 Tel: +86-931-4967356

20 **Abstract**

21 Plateau pikas (*Ochotona curzoniae*) disturbance and patchiness intensify the spatial  
22 heterogeneous distribution of vegetation productivity and soil physicochemical properties,  
23 which may alter ecosystem carbon emission process. Nevertheless, previous researches have  
24 mostly focused on the homogeneous vegetation patches rather than heterogeneous land  
25 surface. Thus, this study aims to improve our understanding of the difference in ecosystem  
26 respiration (Re) over heterogeneous land surface in an alpine meadow grassland. Six different  
27 land surface: large bald patch, medium bald patch, small bald patch, intact grassland, above  
28 pika tunnel and pika pile were selected to analyze the response of Re to pikas disturbance and  
29 patchiness, and the key controlling factors. The results showed that (1) Re under intact  
30 grassland were 0.22-1.07 times higher than pika pile and bald patches; (2) soil moisture (SM)  
31 of intact grassland was 2-11% higher than those of pika pile and bald patches despite pikas  
32 disturbance increased water infiltration rate, while soil temperature (ST) under intact  
33 grassland was 1-3°C less than pika pile and bald patches; (3) Soil organic carbon (SOC) and  
34 total nitrogen (TN) under intact grassland were approximate 50 % and 60 % less than above  
35 pika tunnel, whereas 10-30 % and 22-110 % higher than pika pile and bald patched; and (4)  
36 Re was significantly correlated with SM, TN and vegetation biomass ( $P < 0.05$ ). Our results  
37 suggested that pikas disturbance and patchiness altered ecosystem carbon emission pattern,  
38 which was mainly attributed to the reduction of soil water and supply of substrates. Given that  
39 the wide distribution of pikas and large area of bald patches, the varied Re under  
40 heterogeneous land surfaces should not be neglected for estimation of ecosystem carbon  
41 emission at plot or region scale.

42 **Keywords:** pikas disturbance; patchiness; ecosystem respiration; alpine meadow; the  
43 Qinghai-Tibetan Plateau

#### 44 **Introduction**

45 Ecosystem respiration (Re) is the key process to determine the carbon budget in the terrestrial  
46 ecosystem. Thus, even a small imbalances between CO<sub>2</sub> uptake via photosynthesis and CO<sub>2</sub>  
47 release by ecosystem respiration can lead to significant interannual variation in atmospheric  
48 CO<sub>2</sub> (Schimel et al., 2001; Cox et al., 2000; Grogan and Jonasson, 2005; Oberbauer et al.,  
49 2007; Warren and Taranto, 2011). **Dependent on autotrophic (plant) and heterotrophic**  
50 **(microbe) activity, ecosystem respiration is mainly controlled by abiotic factors (primarily**  
51 **temperature and water availability) (Chimner and Welker, 2005; Flanagan and Johnson, 2005;**  
52 **Nakano et al., 2008; Buttlar et al., 2018), and supply of carbohydrate fixed by leaves,**  
53 **vegetation litter and soil organic matter (Janssens et al., 2001; Reichstein et al., 2002).**  
54 Therefore, any external disturbance altering environmental conditions and affecting  
55 vegetation growth would exert profound influence on ecosystem carbon emission.

56 One of the basic function of terrestrial ecosystem is to regulate carbon balance between  
57 the atmosphere and **ecosystem** (Canadell et al., 2007; Le Quéré et al., 2014; Ahlström et al.,  
58 2015). However, this balance would be broken by widespread land degradation (Post and  
59 Kwon, 2000; Dregne, 2002), which accompanied with the reduction of photosynthetic fixed  
60 carbon dioxide from atmosphere and carbon sequestration by soils (Defries et al., 1999;  
61 Upadhyay et al., 2005). It was estimated that land degradation had resulted in 19-29 Pg C loss  
62 worldwide (Lal, 2001). **Over the past decades, grasslands have experienced patchiness**  
63 **throughout the world and this process is still ongoing (Baldi et al., 2006; Wang et al., 2009;**  
64 **Roch and Jaeger, 2014). Patchiness generally refers to a landscape that consists of remnant**  
65 **areas of native vegetation surrounded by a more heterogeneous and patchy situation (Kouki**  
66 **and Löfman, 1998). Other than climate change (Yi et al., 2014), vegetation self-organization**  
67 **(Rietkerk et al., 2004; Venegas et al., 2005; McKey et al., 2010) or anthropogenic**  
68 **disturbances (Kouki and Löfman, 1998; Yi et al., 2016), rodents burrowing activities were**  
69 **also considered as the origin of the patchiness (Wei et al., 2006; Davidson and Lightfoot,**  
70 **2008). This patchiness intensified spatial heterogeneity of land surface and led to the**  
71 **changing of the structure and function of the original ecosystem (Herkert et al., 2003;**  
72 **Bestelmeyer et al., 2006; Lindenmayer and Fischer, 2013). For instance, there is abundant**  
73 **evidence that patchiness not only intensified the spatial heterogeneous distribution of**

74 ecosystem organic carbon (C) and vegetation productivity (Yan et al., 2016; Qin et al., 2018)  
75 but also altered the pattern of coupled water and heat cycling between the land surface and the  
76 atmosphere (Saunders et al., 1991; You et al., 2017; Ma et al., 2018). Consequently, this may  
77 alter ecosystem carbon emission process (Juszczak et al., 2013).

78 Plateau pikas (*Ochotona curzoniae*, hereafter pikas) are small mammals endemic to the  
79 alpine grasslands on the Qinghai-Tibetan Plateau (QTP) (Smith and Foggin, 1999; Lai and  
80 Smith, 2003). Living in underground, they excavated deep layer soil to surface through  
81 foraging and digging activities (Lai and Smith, 2003) and led to substantial bald piles on the  
82 ground. The bald pile was considered to gradually become bald patches under soil erosion,  
83 gravity, freeze-thaw and other factors (Chen et al., 2017; Ma et al., 2018). As a consequence,  
84 natural vegetation patches and adjacent bald patches with different sizes, and pikas piles  
85 represent the most common landscape pattern in the alpine meadow grassland on the QTP.  
86 Previous studies have demonstrated that pikas disturbance and patchiness weaken the function  
87 of alpine meadow as a carbon sink (Liu et al., 13; Peng et al., 2015; Qin et al., 2018) and  
88 accelerated ecosystem carbon emission rate (Qin et al., 2015a). **Nevertheless, most of these**  
89 **studies have mainly focused on ecosystem carbon emission rate under the homogeneous land**  
90 **surface rather than heterogeneous land surfaces.** It remains unclear what the differences of  $R_e$   
91 are among heterogeneous land surfaces, especially under the disturbance of pikas and  
92 patchiness. **Thus, the specific aims of this study were to (1) investigate the spatial**  
93 **heterogeneity of  $R_e$  under the effect of pikas and patchiness; (2) illuminate the potential**  
94 **regulating mechanism of pikas disturbance and patchiness to ecosystem respiration ( $R_e$ ) in an**  
95 **alpine meadow grassland in the northeastern part of Qinghai-Tibetan Plateau (QTP).**

## 96 **Materials and methods**

### 97 **Site description**

98 This study was conducted at the permanent plots at Suli Alpine Meadow Ecosystem  
99 Observation and Experiment Station (98°18'33.2", 38°25'13.5", 3887 m a.s.l.), Northwest  
100 Institute of Eco-Environment and Resources, Chinese Academy of Science. The study area is  
101 characterized by a continental arid desert climate, with low mean annual air temperature, little  
102 rainfall, and high evaporation (Wu et al., 2015). The mean annual air temperature was  
103 approximately -4°C and the annual precipitation ranged from 200 to 400mm, respectively

104 (Chang et al., 2016). The permafrost type at our site is transition and the active layer depth is  
105  $2.78 \pm 1.03$  m (Chen et al., 2012). The dominant plant species in the study area were *Kobresia*  
106 *capillifolia*, *Carex moorcroftii* (Qin et al., 2014). Soils was classified as “felty” with a pH of  
107 8.56, 30.96 % silt and fine, 57.52 % fine sand and 10.68 % coarse sand, and soil bulk density  
108 is  $1.41 \text{ g cm}^{-3}$  within a 0-40 cm depth of the soil layer (Qin et al., 2015b). The grassland in  
109 this area suffered from degradation due to permafrost degradation and external disturbance  
110 from grazing livestock and small mammals, i.e. plateau pikas (Yi et al., 2011, Qin et al.,  
111 2015a). As a result, a mosaic pattern of vegetation patches, bald patches with different sizes  
112 and pika piles was common.

### 113 **Field observation**

114 At early June 2016, three  $100 \text{ m} \times 100 \text{ m}$  plots were established as replicates. In each plot, six  
115 representative land surfaces were selected: (1) large bald patch with size larger than  $9.0 \text{ m}^2$   
116 (LP), (2) medium bald patch with size of  $1.0\text{-}9.0 \text{ m}^2$  (MP), (3) small bald patch with size of  
117 less than  $1.0 \text{ m}^2$  (SP), (4) intact grassland patch (IG), (5) above pika tunnel (PT), (6) old pika  
118 pile (PP) (Figure 1) (Yi et al., 2016; Qin et al., 2018). For each surface type, nine  $1 \text{ m} \times 1 \text{ m}$   
119 quadrats were set up, of which three was used for soil temperature and soil moisture  
120 measurement, three for soil saturated hydraulic conductivity measurement and three for soil  
121 compactness measurement, soil and vegetation sampling. We also set up three  $2 \text{ m} \times 2 \text{ m}$   
122 quadrats in each surface type in a  $100 \text{ m} \times 100 \text{ m}$  plot for measuring ecosystem respiration.

123 (Insert Figure 1 here)

124 Soil temperature and moisture at 10 cm were measured in a  $100 \text{ m} \times 100 \text{ m}$  plot where  
125 ecosystem respiration was measured by using an auto-measurement system (Decagon Inc.,  
126 USA) from early June to the late August. The system consisted of an EM50 logger and five  
127 5TM sensors. The data were logged automatically every 30 minutes. Soil saturated hydraulic  
128 conductivity and compactness were measured one time in each month from June to August.  
129 Soil saturated hydraulic conductivity was measured by Dual Head infiltrometer (Decagon Inc.,  
130 USA). The measurement process included soak time 15 minutes, hold time 20 minutes at low  
131 pressure head (5 cm) and high pressure head (15 cm) with 2 cycles. Each measurement takes  
132 95 minutes altogether. Soil compactness was measured with TJS-750 (Hangzhou Top  
133 Instrument co., LTD, Hangzhou, China) from the soil surface to 10 cm depth. Ecosystem

134 respiration rates were measured using the LICOR-8150 Automated Soil CO<sub>2</sub> Flux System,  
135 which was an accessory for the LI-8100A could connect 16 individual chambers at one time  
136 and were sampled and controlled by the LI-8100A Analyzer Control Unit. The air  
137 temperature inside of the chamber was measured using the internal thermistor of the chamber.  
138 The ecosystem CO<sub>2</sub> fluxes were calculated by the equation as follow.

$$139 \quad F_c = \frac{10VP_0 \left(1 - \frac{W_0}{1000}\right) \frac{\partial C'}{\partial t}}{RS(T_0 + 273.15)}$$

140 where  $F_c$  is the soil CO<sub>2</sub> efflux rate ( $\mu\text{mol m}^{-2} \text{s}^{-1}$ ),  $V$  is volume ( $\text{cm}^3$ ),  $P_0$  is the initial pressure  
141 (kPa),  $W_0$  is the initial water vapor mole fraction ( $\text{mmol mol}^{-1}$ ),  $S$  is soil surface area ( $\text{cm}^2$ ),  $T_0$   
142 is initial air temperature ( $^{\circ}\text{C}$ ), and  $\partial C'/\partial t$  is the initial rate of change in water-corrected CO<sub>2</sub>  
143 mole fraction ( $\mu\text{mol}^{-1} \text{mol s}^{-1}$ ).

144 Six LICOR-8100-104 long-term opaque chambers (20cm in diameter LICOR, Inc.,  
145 Lincoln, NE, USA) were used to measure alternately between three replicates for six land  
146 surface types. Therefore, 3 days at least were required to complete one rotation measurements  
147 of ecosystem respiration. To measure ecosystem respiration, eighteen polyvinyl chloride  
148 collars with a 20 cm inner diameter and a 12 cm height were inserted into the soil with 3-4 cm  
149 exposed to the air (Qin et al., 2013). All of the collars were installed at least 24 h before the  
150 first measurement to reduce disturbance-induced ecosystem CO<sub>2</sub> effluxes. Ecosystem  
151 respiration rates were measured every 7-10 days from June 16 to August 20 in 2016  
152 depending on weather conditions. A round-the-clock measurement protocol was carried out  
153 and ecosystem respiration rates were measured every 30 minutes. Each measurement takes 1  
154 minute and 45 seconds, including pre-purge 10 seconds, dead band 15 seconds, observation  
155 length 1 minute and post-purge 20 seconds.

### 156 **Soil and vegetation sampling**

157 Soil samples were collected during the periods of late July to early August 2016. In each  
158 surface type of each plot, five soil cores were collected using a stainless-steel auger (5 cm in  
159 diameter) at depths of 0-10, 10-20, 20-30 and 30-40 cm, and bulked as one composite sample  
160 for each depth in each quadrat. Another five soil cores were sampled by cylindrical cutting  
161 ring (7 cm in diameter and 5.2 cm in depth) to determine soil bulk density from each land



162 surface type. Pika tunnel was approximate 6 cm in diameter and 40 cm in depth. Therefore,  
 163 soil samples were available to collect at depth of 40cm. Totally, 512 soil samples were  
 164 collected. Soil samples were firstly air-dried, then removed gravel and stone with manual  
 165 sieving and finally weighed. The remaining soil samples with diameter less than 2 mm were  
 166 ground to pass through a 0.25 mm sieve for analysis of soil organic carbon (SOC) and soil  
 167 total nitrogen (TN) concentration. SOC was measured by dichromate oxidation using  
 168 Walkley-Black acid digestion (Nelson and Sommers, 1982). TN was determined by digestion  
 169 and then tested using a flow injection analysis system (FIAstar 5000, Foss Inc., Sweden).  
 170 Aboveground and belowground biomasses were determined within a 1 m × 1 m quadrat on 4  
 171 August 2016 during peak biomass and species diversity. There were a total of 108  
 172 aboveground and belowground vegetation samples (3 plots × 6 land surface types × 3  
 173 replicates) from the study area. Aboveground biomass was determined by clipping all  
 174 above-ground living plants at ground level, drying (oven-dried at 65°C for 48 h) and weighing.  
 175 Belowground biomass was sampled by collecting five soil columns, and each soil column was  
 176 5 cm in diameter and 40 cm in depth. Soil cores were washed with a gentle spray of water  
 177 over a fine mesh screen until soil separated from the roots, and then drying (oven-dried at  
 178 65°C for 48 h) and weighing.

### 179 **Statistical analysis**

180 The soil organic C (kg m<sup>-2</sup>) and total N (kg m<sup>-2</sup>) densities in different land surface were  
 181 calculated using the equation (1) and (2):

$$182 \quad \text{SOC} = \sum_{i=1}^n \rho * (1 - \sigma_{\text{gravel}}) * C_{\text{SOC}} * D_i \quad (1)$$

$$183 \quad \text{TN} = \sum_{i=1}^n \rho * (1 - \sigma_{\text{gravel}}) * C_{\text{TN}} * D_i \quad (2)$$

184 where SOC is soil organic C density, TN is soil total N density,  $\rho$  is the soil bulk density (g  
 185 cm<sup>-3</sup>),  $\sigma_{\text{gravel}}$  is the relative volume of gravel (% w/w),  $C_{\text{SOC}}$  is soil organic C content (g kg<sup>-1</sup>),  
 186  $C_{\text{TN}}$  is soil total N content (g kg<sup>-1</sup>) and  $D_i$  is soil thickness (cm) at layer  $i$ , respectively;  $i=1, 2,$   
 187 3 and 4.

188 The data were presented as mean ± standard deviation. Statistical analyses were performed  
 189 using the SPSS 17.0 statistical software package (SPSS Inc., Chicago, IL, USA). One-way

190 analysis of variance (ANOVA) and a multi-comparison of a least significant difference (LSD)  
191 test were used to determine differences at the  $p=0.05$  level. The relationships of ecosystem  
192 respiration with biotic and abiotic factors were analyzed by correlation analysis using R.

## 193 **Results**

### 194 **Ecosystem respiration**

195 Pika disturbance and patchiness had significant effect on ecosystem respiration (Table 1,  
196  $P<0.001$ ). During the growing season, ecosystem respiration has a maximum value in August  
197 and minimum value in June (Figure 2). In June, ecosystem respiration under intact grassland,  
198 above pika tunnel, small patch and pika pile had no significant difference and the lowest  
199 ecosystem respiration were found under large and medium patches (Figure 2). Average  
200 ecosystem respiration under intact grassland was  $4.03 \mu\text{mol m}^{-2} \text{s}^{-1}$ , which were 6.90 % to  
201 102.50 % higher than other surface types both in July and August (Figure 2).

202 (Insert Figure 2 here)

### 203 **Microclimate and soil hydrothermal characteristics**

204 Mean temperature and total rainfall during the growing seasons from 1 May to 30 September  
205 in 2016 were  $6.18 \text{ }^{\circ}\text{C}$  and 343.4 mm, respectively (Figure 3). Soil temperature and moisture  
206 were significantly different ( $P<0.001$ ) among various surface types (Table 1). The monthly  
207 average soil temperature was in a range of  $8.20\text{-}13.72 \text{ }^{\circ}\text{C}$  during June to August, which was  
208 approximate  $1\text{-}3 \text{ }^{\circ}\text{C}$  higher under pika pile and bald patches than the intact grassland (Figure  
209 4a,  $P<0.05$ ). The monthly mean soil moisture from June to August was approximate 30 % for  
210 intact grassland and above pika tunnel, 25 % for small patch and pika pile, and 20 % for  
211 larger and medium patch (Figure 4b). Soil saturated hydraulic conductivity also showed  
212 significant variation under different land surface types ( $P=0.027$ , Table 2). Soil saturated  
213 hydraulic conductivity of intact grassland had no significant difference with small patch and  
214 above pika tunnel ( $P>0.05$ ), while it was approximate 40 % higher than medium and large  
215 patches and 17 % lower than pika pile (Figure 5).

216 (Insert Table 1, Figure 3 to 5 here)

### 217 **Soil and vegetation properties**

218 Both pika disturbance and patchiness significantly affected soil compactness, SOC density,  
219 TN density and vegetation biomass (Table 2) ( $P<0.001$ ). Soil compactness was over 0.30 Pa

220 in intact grassland and above pika tunnel, approximate 0.20 Pa for bald patches and less than  
221 0.10 Pa for pika pile (Figure 6), respectively. Mean SOC and TN density under intact  
222 grassland were 52.45 % and 59.14 % less than above pika tunnel, whereas they were  
223 9.69-30.12 % and 22.47-109.62 % higher than pika pile and bald patches (Figure 7).  
224 Aboveground and belowground biomass under intact grassland were approximate 30 %  
225 higher than above pika tunnel, 90 % higher than pika pile, 123-252 % and 134-289 % higher  
226 than bald patches (Figure 8a, b).

227 (Insert Table 2, Figure 6 to 8 here)

### 228 **Factors regulate ecosystem respiration**

229 We analyzed the relationships of ecosystem respiration with biotic and abiotic factors for six  
230 land surface types (Figure 9). Correlation analysis showed that ecosystem respiration had no  
231 significant correlation with soil temperature ( $P>0.05$ , Figure 9). However, ecosystem  
232 respiration was significantly and positively related to soil moisture ( $P<0.01$ ), soil total  
233 nitrogen ( $P<0.05$ ), aboveground ( $P<0.05$ ) and belowground biomass ( $P<0.05$ ) (Figure 9).

234 (Insert Figure 9 here)

### 235 **Discussion**

#### 236 **Effect of pikas disturbance on ecosystem respiration**

237 Pikas burrowing activities increased oxygen content in deep soil, which contributed to the  
238 decomposition of soil organic matter (Martin, 2003). The deposition of urine and feces by  
239 small herbivorous mammals could also promote ecosystem nutrition circulation (Clark et al.,  
240 2005). It was suggested that excreta deposited by pikas and frequently haunted in or near their  
241 burrows supplied organic C available to microbial decomposition with an increase in  
242 ecosystem CO<sub>2</sub> emission (Cao et al., 2004). Indeed, SOC and TN densities reached up to  
243 14.54 and 0.98 kg m<sup>-2</sup> in above pika tunnel, which was 2.45 and 2.10 times higher than that of  
244 intact grassland (Figure 7), respectively. The consistent results reported that the contents of  
245 available soil nutrients around the pikas burrow were higher than those in control sites on an  
246 alpine meadow (Zhang et al., 2016). We also found that SOC and TN densities under pika pile  
247 decreased 13.35 % and 42.93 % than intact grassland. However, no significant difference of  
248 Re was found between intact grassland and above pika tunnel, while Re under pika pile were  
249 42.08 % less than intact grassland (Figure 2). The similar result was also found in an alpine

250 meadow on the QTP (Peng et al., 2015), which indicated that ecosystem respiration decreased  
251 with increasing of pika holes because of grassland biomass regulated soil C and N with  
252 increasing number of pika holes. These results confirmed that pikas disturbance did not  
253 increase ecosystem carbon emission directly, but facilitated CO<sub>2</sub> emission into the atmosphere  
254 through pika holes (Qin et al., 2015a). The difference of ecosystem respiration between intact  
255 grassland and pika piles was mainly related to changes in vegetation biomass and soil  
256 moisture. For example, both aboveground and belowground biomass decreased 244.62 % and  
257 279.89 % under pika piles compared with the intact grassland (Figure 8). The reduction of  
258 vegetation biomass production decreased aboveground plant respiration and root respiration  
259 by decreasing carbon allocation (e.g., root exudates and litter, and available SOC) (Raich and  
260 Potter, 1995; Högberg et al., 2002; Yang et al., 2018). Consistent with previous studies which  
261 demonstrated that pikas burrowing activity increased water infiltration rate (Hogan, 2010;  
262 Wilson and Smith, 2015), our results also showed that soil saturated hydraulic conductivity in  
263 pika pile was significantly higher than bald and vegetation patches (Figure 5). Nevertheless,  
264 the increased water infiltration was unable to increase soil moisture under pika piles. For  
265 example, soil moisture under pika piles was approximate 5 % lower than intact grassland  
266 (Figure 4). Our result was discrepant with previous studies which reported old pika mound  
267 had the highest soil moisture during the summer (Ma et al., 2018) and moderate pika  
268 burrowing activities increased surface soil moisture (Li and Zhang, 2006). This difference  
269 may be contributed to the high pika density in alpine meadow (Guo et al, 2017). Moreover,  
270 pika piles were loose (Figure 6) with less vegetation cover (Figure 8), which was not  
271 beneficial for soil moisture storage.

### 272 **Effect of patchiness on ecosystem respiration**

273 Our results clearly showed that patchiness resulted in significant reduction of ecosystem  
274 carbon emission. Compared with the intact grassland, ecosystem respiration decreased  
275 approximate 17-48 % for bald patches (Figure 2). Two possible mechanisms could account  
276 for the effects of patchiness on ecosystem respiration. On one hand, the reduction of SOC and  
277 TN decreased microbial respiration by decreasing substrate supply to microbes in the  
278 rhizosphere (Nobili et al., 2001; Scott-Denton et al., 2010). Our results indicated that  
279 patchiness caused evident loss of SOC and TN (Figure 7) due to reduction in C input from

280 vegetation and increasing in C output from soil erosion (Qin et al., 2018). Previous study have  
281 shown that the spatial heterogeneity of soil respiration was attributed to uneven soil organic  
282 carbon and total nitrogen content (Xu and Qi, 2010). Soil organic carbon was considered as  
283 the basic substrate of CO<sub>2</sub> emission by microbial decomposition (Sikora and Mccoy, 1990)  
284 and soil total N enhanced ecosystem CO<sub>2</sub> emission by providing a source of protein for  
285 microbial growth (Tewary et al., 1982). On the other hand, low moisture availability would  
286 limit microbial respiration by restricting access to C substrates, reducing the diffusion of C  
287 substrates and extracellular enzymes, and limiting microbial mobility (Yuste et al., 2003;  
288 Wang et al., 2014). Our results showed that soil moisture under large and medium patches  
289 decreased 10 % than intact grassland (Figure 4). Previous studies had reported that the soil  
290 compaction of bald patches decreased the rate of water infiltration (Wuest et al., 2006; Wilson  
291 and Smith, 2015), which was similar with our results showed that bald patches had less  
292 saturated soil hydraulic conductivity (Figure 5). Low vegetation cover under bald patches was  
293 not beneficial for water retention and utilization, where most of soil water was mainly lost as  
294 a way of evaporation (Yi et al., 2014). We have measured evaporation of the intact grassland,  
295 isolate grassland, large patches, medium patches and small patches since the early June 2016.  
296 Three years results indicated that evaporation under bald patches were higher than the intact  
297 grassland (data were not shown here).

### 298 **Factors affected ecosystem respiration**

299 Most previous studies showed that soil temperature explained most of the temporal variation  
300 of ecosystem respiration on the alpine grassland on the QTP (Lin et al, 2011; Qin et al., 2015c;  
301 Zhang et al., 2017). Our results indicated that soil temperature under pika piles and bald  
302 patches was approximate 1 to 3 °C higher than intact grassland (Figure 4), which mainly  
303 resulted from the heterogeneity of surface albedo, surface soil water retention, heat  
304 conduction properties and radiation (Beringer et al., 2005; Pielke, 2005; Yi et al., 2013; You et  
305 al., 2017). It was suggested that pikas disturbance create a better soil temperature buffer for  
306 them to avoid the extreme cold in winter (Ma et al., 2018), whereas high soil temperature  
307 under bald patch was a disadvantage for the recovery of vegetation because patch surface had  
308 the smallest soil moisture content (Figure 4) and the largest daily range of soil temperature  
309 (Ma et al., 2018). However, no an obvious relationship between Re and soil temperature was

310 found in the present study (Figure 9), which suggested that other factors involved in  
311 controlling Re induced by pikas disturbance and patchiness. Our results showed that Re were  
312 positively correlated with soil moisture, soil total nitrogen, aboveground and belowground  
313 biomass (Figure 9). Pikas disturbance and patchiness led to the drying and loosening of soil  
314 (Figure 4 and 6). It was considered that loose, dry surface sediments and strong winds were  
315 the primary factors responsible for soil erosion (Dong et al., 2010b) and wind erosion was  
316 especially common in arid and semi-arid regions (Zhang and Dong, 2014). This resulted in  
317 the reduction of soil organic carbon, total nitrogen and vegetation biomass (Figure 7 and 8).  
318 The alteration of these biotic and abiotic factors induced by pikas disturbance and patchiness  
319 led to the decline of ecosystem respiration. Nevertheless, the decline of ecosystem respiration  
320 did not completely offset the sequestration of C fixed by photosynthesis because of the lower  
321 vegetation cover under bald patches and pika piles. Given the large area covered by bald  
322 patches in alpine grasslands, patchiness was more susceptible to erosion and exert greater  
323 influence on ecosystem respiration than pikas disturbance. Recent study has also reported that  
324 bald patches of various sizes on the grasslands played a much more important role than pikas  
325 direct disturbance in reducing vegetation cover, aboveground biomass, soil carbon and  
326 nitrogen (Yi et al., 2016).

## 327 **Conclusions**

328 In this study, we investigated soil physicochemical properties, vegetation biomass and  
329 ecosystem respiration (Re) under six land surfaces originating from pikas disturbance and  
330 patchiness. We also analyzed the dominant factors regulated the Re. Our results showed that  
331 pikas disturbance and patchiness decreased soil moisture but increased soil temperature,  
332 which may be conducive to pikas survive in cold season but disadvantage for vegetation  
333 growth. Patchiness caused evident decreasing in SOC and TN density, while both SOC and  
334 TN density showed different response under pika piles and burrows. Both pikas disturbance  
335 and patchiness decreased ecosystem carbon emission, and ecosystem respiration sharply  
336 correlated with soil moisture, TN and vegetation biomass. Our results indicated that pikas  
337 disturbance and patchiness led to the changing of ecosystem respiration process owing to the  
338 drying of soil and the reduction of substrate supply. However, the decline of ecosystem  
339 respiration may not able to offset the sequestration of C fixed by photosynthesis.

340 **Acknowledgment**

341 The authors would like to thank Mr. Jun Zhang and Bingbing Bai for their help in field  
342 sampling. This study was jointly supported by grants from the National Key R&D Program of  
343 China (2017YFA0604801), the National Natural Science Foundation of China (41501081 and  
344 41690142), the independent grants from the State Key Laboratory of Cryosphere Sciences  
345 (SKLCS-ZZ-2018) and science and technology support program of Science and Technology  
346 Agency in Guizhou “The Key technology and engineering demonstration of farmland system  
347 control and restoration in Tongren mercury polluted area” (Qiankehezhicheng[2017]2967).

348 **References**

- 349 Ahlström, A., Xia, J., Arneth, A., Luo, Y., Smith, B.: Importance of vegetation dynamics for  
350 future terrestrial carbon cycling, *Environ. Res. Lett.*, 10(5), 2015.
- 351 Baldi, G., Guerschman, J.P., Paruelo, J.M.: Characterizing fragmentation in temperate South  
352 America grasslands, *Agr. Ecosyst. Environ.*, 116, 197-208, 2006.
- 353 Beringer, J., Chapin, F.S., Thompson, C.C., McGuire, A.D.: Surface energy exchanges along a  
354 tundra-forest transition and feedbacks to climate, *Agric. For. Meteorol.*, 131, 143-161,  
355 2005.
- 356 Bestelmeyer, B.T., Ward, J.P., Herrick, J.E., Tugel, A.J.: Fragmentation effects on soil  
357 aggregate stability in a patchy arid grassland, *Rangeland. Ecol. Manag.*, 59(4), 406-415,  
358 2006.
- 359 Buttler, J. V., Zscheischler, J., Rammig, A., Sippel, S., Reichstein, M., Knohl, A., et al.:  
360 Impacts of droughts and extreme-temperature events on gross primary production and  
361 ecosystem respiration: a systematic assessment across ecosystems and climate  
362 zones, *Biogeosciences*, 15, 1293-1318, 2018.
- 363 Canadell, J.G., Kirschbaum, M. U.F., Kurz, W. A., Sanz, M.J., Schlamadinger, B., Yamagata,  
364 Y.: Factoring out natural and indirect human effects on terrestrial carbon sources and  
365 sinks, *Environ. Sci. Policy.*, 10(4), 370-384, 2007.
- 366 Cao, G.M., Tang, Y.H., Mo, W.H., Wang, Y.S., Li, Y.N., Zhao, X.Q.: Grazing intensity alters  
367 soil respiration in an alpine meadow on the Tibetan plateau, *Soil Biol. Biochem.*, 36,  
368 237-243, 2004.
- 369 Chang, Y., Ding, Y., Zhao, Q., Zhang, S.: Remote estimation of terrestrial evapotranspiration

370 by Landsat 5 TM and the SEBAL model in cold and high-altitude regions: A case study  
371 of the upper reach of the Shule River Basin, China, *Hydrol. Process.*, 31(3), 514-524,  
372 2016.

373 Chen, J., Yi, S., Qin, Y.: The contribution of plateau pika disturbance and erosion on patchy  
374 alpine grassland soil on the Qinghai-Tibetan Plateau: Implications for grassland  
375 restoration, *Geoderma*, 297, 1-9, 2017.

376 Chen, S., Liu, W., Qin, X., Liu, Y., Zhang, T., Chen, K., Hu, F., Ren, J., Qin, D.: Response  
377 characteristics of vegetation and soil environment to permafrost degradation in the  
378 upstream regions of the Shule River Basin, *Environ. Res. Lett.*, 7(4), 045406, 2012.

379 Chimner R. A. and Welker, J.M.: Ecosystem Respiration Responses to Experimental  
380 Manipulations of Winter and Summer Precipitation in a Mixedgrass Prairie, WY, USA,  
381 *Biogeochem*, 73(1), 257-270, 2005.

382 Clark, J.E., Hellgren, E.C., Parsons, J.L., Jorgensen, E.E., Engle, D.M., Leslie, D.M.:  
383 Nitrogen outputs from fecal and urine deposition of small mammals: implications for  
384 nitrogen cycling, *Oecologia*, 144(3), 447-455, 2005.

385 Cox, P.M., Betts, R.A., Jones, C.D., Spall, S.A., Totterdell, I.J.: Acceleration of global  
386 warming due to carbon-cycle feedbacks in a coupled climate model, *Nature*, 408,  
387 184-187, 2000.

388 Davidson, A.D. and Lightfoot, D.C.: Burrowing rodents increase landscape heterogeneity in a  
389 desert grassland, *J. Arid. Environ.*, 72(7), 1133-1145, 2008.

390 Defries, R.S., Field, C.B., Fung, I., Collatz, G.J., Bounoua, L.: Combining satellite data and  
391 biogeochemical models to estimate global effects of human-induced land cover change  
392 on carbon emissions and primary productivity, *Global. Biogeochem. Cy.*, 13(3), 803-815,  
393 1999.

394 Dregne, H.E.: Land degradation in the drylands, *Arid Soil Res. Rehab.*, 16(2), 99-132, 2002.

395 Flanagan, L.B. and Johnson, B.G.: Interacting effects of temperature, soil moisture and plant  
396 biomass production on ecosystem respiration in a northern temperate grassland, *Agr.*  
397 *Forest. Meteorol.*, 130(3), 237-253, 2005.

398 Grogan, P. and Jonasson, S.: Temperature and substrate controls on intra-annual variation in  
399 ecosystem respiration in two subarctic vegetation types, *Global. Change. Biol.*, 11,



400 465-475, 2005.

401 Guo, X.L., Yi, S.H., Qin, Y., Chen, J.J.: Habitat environment affects the distribution of plateau  
402 pikas: a study based on an unmanned aerial vehicle, *Pratacul. Sci.*, 34(6), 1306-1313,  
403 2017.

404 Herkert, J.R., Reinking, D.L., Wiedenfeld, D.A., Winter, M., Zimmerman, J.L., Jensen, W.E.,  
405 Finck, E.J., Koford, R.R., Wolfe, D.H., Sherrod, S.K., Jenkins, M.A., Faaborg, J.,  
406 Robinson, S.K.: Effects of prairie fragmentation on the nest success of breeding birds in  
407 the mid-continental United States, *Conserv. Biol.*, 17, 587-94, 2003.

408 Hogan, B.W.: The plateau pika: A keystone engineer on the Tibetan Plateau, Doctoral  
409 dissertation. Tempe, AZ: Arizona State University, 2010.

410 Högberg, P., Nordgren, A., Ågren, G.I.: Carbon allocation between tree root growth and root  
411 respiration in boreal pine forest, *Oecologia*, 132, 579-581, 2002.

412 Janssens, I. A., Lankreijer, H., Matteucci, G., Kowalski, A. S., Buchmann, N., Epron, D., et al.:  
413 Productivity overshadows temperature in determining soil and ecosystem respiration  
414 across european forests, *Global. Change. Biol.*, 7(3), 269-278, 2001.

415 Juszczak, R., Humphreys, E., Acosta, M., Michalak-Galczewska, M., Kayzer, D., Olejnik, J.:  
416 Ecosystem respiration in a heterogeneous temperate peatland and its sensitivity to peat  
417 temperature and water table depth, *Plant. Soil.*, 366(1-2), 505-520, 2013.

418 Kouki, J. and Löfman, S.: Forest fragmentation: processes, concepts and implication for  
419 species. In: *Key Concepts in Landscape Ecology. Proceedings of the 1998 European*  
420 *congress of IALE*, Preston, 1998.

421 Lai, C.H. and Smith, A.T.: Keystone status of plateau pikas (*Ochotona curzoniae*): effect of  
422 control on biodiversity of native birds, *Biodiver. Conserv.*, 12, 1901-1912, 2003.

423 Lal, R.: Potential of desertification control to sequester carbon and mitigate the greenhouse  
424 effect, *Climatic Change*, 51(1), 35-72, 2001.

425 Le Quéré, C., Peters, G.P., Andres, R.J., Andrew, R.M., Boden, T.A., Ciais, P., Friedlingstein,  
426 P., Houghton, R.A., Marland, G., Moriarty, R., Sitch, S., Tans, P., Arneeth, A., Arvanitis,  
427 A., Bakker, D.C.E., Bopp, L., Canadell, J. G., Chini, L.P., Doney, S.C., Harper, A.,  
428 Harris, I., House, J.I., Jain, A.K., Jones, S.D., Kato, E., Keeling, R.F., Klein Goldewijk,  
429 K., Körtzinger, A., Koven, C., Lefèvre, N., Maignan, F., Omar, A., Ono, T., Park, G.-H.,

430 Pfeil, B., Poulter, B., Raupach, M.R., Regnier, P., Rödenbeck, C., Saito, S., Schwinger, J.,  
431 Segschneider, J., Stocker, B.D., Takahashi, T., Tilbrook, B., van Heuven, S., Viovy, N.,  
432 Wanninkhof, R., Wiltshire, A., and Zaehle, S.: Global carbon budget 2013, *Earth Syst.*  
433 *Sci. Data*, 6, 235-263, 2014.

434 Lindenmayer, D.B. and Fischer, J.: *Habitat fragmentation and landscape change: an*  
435 *ecological and conservation synthesis*, Island Press, 2013.

436 Lin, X.W., Zhang, Z.H., Wang, S.P., Hu, Y.G., Xu, G.P., Luo, C.Y., Chang, X.F., Duan, J.C.,  
437 Lin, Q.Y., Xu, B.R.B.Y., Wang, Y.F., Zhao, X.Q., Xie, Z.B.: Response of ecosystem  
438 respiration to warming and grazing during the growing seasons in the alpine meadow on  
439 the Tibetan plateau, *Agric. For. Meteorol.*, 151, 792-802, 2011.

440 Liu, Y.S., Fan, J.W., Harris, W., Shao, Q.Q., Zhou, Y.C., Wang, N., Li, Y.Z.: Effects of plateau  
441 pika (*Ochotona curzoniae*) on net ecosystem carbon exchange of grass-land in the Three  
442 Rivers Headwaters region, Qinghai-Tibet, China, *Plant. Soil.*, 366,491-504, 2013.

443 Li, W. and Zhang, Y.: Impacts of plateau pikas on soil organic matter and moisture content in  
444 alpine meadow, *Acta. Theriol. Sin.*, 26(4), 331-337, 2006.

445 Ma, Y.J., Wu, Y.N., Liu, W.L., Li, X.Y., Lin, H.S.: Microclimate response of soil to plateau  
446 pika's disturbance in the northeast qinghai-tibet plateau, *European Journal of Soil*  
447 *Science*, 69(2), 232-244, 2018.

448 Martin, B.G.: The role of small ground-foraging mammals in topsoil health and biodiversity:  
449 Implications to management and restoration, *Ecol. Manag. Restor.*, 4(2), 114-119, 2003.

450 McKey, D., Rostain, S., Iriarte, J., Glaser, B., Birk, J.J., Holst, I., Renard, D.: Pre-Columbian  
451 agricultural landscapes, ecosystem engineers, and self-organized patchiness in  
452 Amazonia, *P. Natl. Acad. Sci.*, 107(17), 7823-7828, 2010.

453 Nakano, T., Nemoto, M., Shinoda, M.: Environmental controls on photosynthetic production  
454 and ecosystem respiration in semi-arid grasslands of Mongolia, *Agric. Forest. Meteorol.*,  
455 148, 1456-1466, 2008.

456 Nobili, M.D., Contin, M., Mondini, C., Brookes, P.C.: Soil microbial biomass is triggered into  
457 activity by trace amounts of substrate, *Soil Biol. Biochem.*, 33(9), 1163-1170, 2001.

458 Oberbauer, S.F., Tweedie, C.E., Welker, J.M., Fahnestock, J.T., Henry, G.H.R, Webber, P.J.,  
459 Hollister, R.D., Walker, M.D., Kuchy, A., Elmore, E., Starr, G.: Tundra CO<sub>2</sub> fluxes in

460 response to experimental warming across latitudinal and moisture gradients, *Ecol.*  
461 *Monogr.*, 77, 221-238, 2007.

462 Peng, F., Quangan, Y., Xue, X., 111, J., Wang, T.: Effects of rodent-induced land degradation  
463 on ecosystem carbon fluxes in alpine meadow in the Qinghai-Tibet Plateau, China, *Solid.*  
464 *Earth.*, 6, 303-310, 2015.

465 Pielke, R.A.: Land use and climate change, *Science.*, 310 (5754), 1625-1626, 2005.

466 Post, W.M. and Kwon, K.C.: Soil carbon sequestration and land-use change: processes and  
467 potential, *Global. Change. Biol.*, 6(3), 317-327, 2000.

468 Qin, Y., Chen, J.J., Yi, S.H.: Plateau pikas burrowing activity accelerates ecosystem carbon  
469 emission from alpine grassland on the Qinghai-Tibetan Plateau, *Ecol. Eng.*, 84, 287-291,  
470 2015a.

471 Qin, Y. and Yi, S.: Diurnal characteristics of ecosystem respiration of alpine meadow on the  
472 qinghai-tibetan plateau: implications for carbon budget estimation. *Sci. World. J.*,  
473 2013(1), 289754, 2013.

474 Qin, Y., Yi, S.H., Chen, J.J., Ren, S.L., Ding, Y.J.: Effects of gravel on soil and vegetation  
475 properties of alpine grassland on the Qinghai-Tibetan plateau, *Ecol. Eng.*, 74, 351-355,  
476 2015b.

477 Qin, Y., Yi, S., Chen, J., Ren, S., Wang, X.: Responses of ecosystem respiration to short-term  
478 experimental warming in the alpine meadow ecosystem of a permafrost site on the  
479 qinghai-tibetan plateau, *Cold. Reg. Sci. Technol.*, 115, 77-84, 2015c.

480 Qin, Y., Yi, S., Ding, Y., Xu, G., Chen, J., Wang, Z.: Effects of small-scale patchiness of  
481 alpine grassland on ecosystem carbon and nitrogen accumulation and estimation in  
482 northeastern qinghai-tibetan plateau, *Geoderma*, 318, 52-63, 2018.

483 Qin, Y., Yi, S., Ren, S., Li, N., Chen, J.: Responses of typical grasslands in a semiarid basin  
484 on the Qinghai-Tibetan plateau to climate change and disturbances, *Environ. Earth. Sci.*,  
485 71, 1421-1431, 2014.

486 Raich, J.W. and Potter, C.S.: Global patterns of carbon-dioxide emissions from soils, *Glob.*,  
487 *Biogeochem. Cycles* 9, 23-36, 1995.

488 Reichstein, M., Tenhunen, J.D., Rouspard, O., Ourcival, J.-M., Rambal, S., Dore, S., Valentini,  
489 R.: Ecosystem respiration in two Mediterranean evergreen Holm oak forests: drought

490 effects and decomposition dynamics, *Funct. Ecol.*, 16, 27-39, 2002.

491 Rietkerk, M., Dekker, S.C., de Ruiter, P.C., van de Koppel, J.: Self-organized patchiness and  
492 catastrophic shifts in ecosystems, *Science*, 305(5692), 1926-1929, 2004.

493 Roch, L. and Jaeger, J.A.: Monitoring an ecosystem at risk: What is the degree of grassland  
494 fragmentation in the Canadian Prairies? *Environ. Monit. Assess.*, 186(4), 2505-2534,  
495 2014.

496 Saunders, D.A., Hobbs, R.J., Margules, C.R.: Biological consequences of ecosystem  
497 fragmentation: a review, *Conserv. Biol.*, 5(1), 18-32, 1991.

498 Schimel, D.S., House, J.I., Hibbard, K.A., Bousquet, P., Ciais, P., Peylin, P., Braswell, B.H.,  
499 Apps, M.J., Baker, D., Bondeau, A., J. Canadell, G. Churkina, W. Cramer, A. S. Denning,  
500 C. B. Field, P. Friedlingstein, C. Goodale, M. Heimann, Houghton, R.A., Melillo, J.M.,  
501 Moore III, B., Murdiyarso, D., Noble, I., Pacala, S.W., Prentice, I.C., Raupach, M.R.,  
502 Rayner, P.J., Scholes, R.J., Steffen, W.L., Wirth, C.: Recent patterns and mechanisms of  
503 carbon exchange by terrestrial ecosystems, *Nature*, 414(6860), 169-72, 2001.

504 Scott-Denton, L., Rosenstiel, T., Monson, R.: Differential controls by climate and substrate  
505 over the heterotrophic and rhizospheric components of soil respiration, *Global Change  
506 Biol.*, 12(2), 205-216, 2010.

507 Sikora, L.J. and McCoy, J.L.: Attempts to determine available carbon in soils. *Biol. Fertility.  
508 Soils.*, 9(1), 19-24, 1990.

509 Smith, A.T. and Foggin, J.M.: The plateau pika (*Ochotona curzoniae*) is a keystone species  
510 for biodiversity on the Tibetan plateau, *Anim. Conserv.*, 2, 235-240, 1999.

511 Tewary, C.K., Pandey, U., Singh, J.S.: Soil and litter respiration rates in different  
512 microhabitats of a mixed oak-conifer forest and their control by edaphic conditions and  
513 substrate quality, *Plant Soil*, 65(2), 233-238, 1982.

514 Upadhyay, T.P., Sankhayan, P.L., Solberg, B.: A review of carbon sequestration dynamics in  
515 the himalayan region as a function of land-use change and forest/soil degradation with  
516 special reference to nepal, *Agr. Ecosystems. Environ.*, 105(3), 449-465, 2005.

517 Venegas, J.G., Winkler, T., Musch, G., Melo, M.F.V., Layfield, D., Tgavalekos, N., Fischman,  
518 A.J., Callahan, R.J., Bellani, G., Harris, R.S.: Self-organized patchiness in asthma as a  
519 prelude to catastrophic shifts, *Nature*, 434(7034), 777-782, 2005.

520 Wang, B., Zha, T.S., Jia, X., Wu, B., Zhang, Y.Q., Qin, S.G.: Soil moisture modifies the  
521 response of soil respiration to temperature in a desert shrub ecosystem, *Biogeosciences*,  
522 11, 259-268, 2014.

523 Wang, Z., Song, K., Zhang, B., Liu, D., Ren, C., Luo, L., Yang, T., Huang, N., Hu, L., Yang,  
524 H., Liu, Z.: Shrinkage and fragmentation of grasslands in the West Songnen Plain,  
525 China, *Agr. Ecosyst. Environ.*, 129(1), 315-324, 2009.

526 Warren, C.R. and Taranto, M. T.: Ecosystem Respiration in a Seasonally  
527 Snow-Covered Subalpine Grassland, *Arct. Antarct. Alp Res.*, 43(1), 137-146,  
528 2011.

529 Wei, X.H., Li, S., Yang, P.: Changes of soil physical and chemical property of Alpine  
530 Kobresia Meadow around plateau pika entrances in the process of related to erosion,  
531 *Grassl. China.*, 28 (4), 24-29, 2006 (in Chinese).

532 Wilson, M.C. and Smith, A.T.: The pika and the watershed: The impact of small mammal  
533 poisoning on the ecohydrology of the Qinghai-Tibetan Plateau, *Ambio*, 44(1), 16-22,  
534 2015.

535 Wuest, S.B., Williams, J.D., Gollany, H.T.: Tillage and perennial grass effects on ponded  
536 infiltration for seven semi-arid loess soils, *J. Soil and Water Conservation.*, 61, 218-223,  
537 2006.

538 Wu, J.K., Zhang, S.Q., Wu, H., Liu, S.W., Qin, Y., Qin, J.: Actual Evapotranspiration in Suli  
539 Alpine Meadow in Northeastern Edge of Qinghai-Tibet Plateau, China, *Adv. Meteorol.*,  
540 2015 (3), 1-10, 2015.

541 Xu, M. and Qi, Y.: Soil-surface CO<sub>2</sub> efflux and its spatial and temporal variations in a young  
542 ponderosa pine plantation in northern california, *Global. Change. Biol.*, 7(6), 667-677,  
543 2010

544 Yan, Y., Xin, X., Xu, X., Wang, X., Yan, R., Murray, P.J.: Vegetation patches increase  
545 wind-blown litter accumulation in a semi-arid steppe of northern China, *Environ. Res.*  
546 *Lett.*, 11(12), 124008, 2016.

547 Yang, P., Lai, D.Y.F., Huang, J.F., Zhang, L.H., Tong, C.: Temporal variations and temperature  
548 sensitivity of ecosystem respiration in three brackish marsh communities in the min river  
549 estuary, southeast china, *Geoderma*, 327 (2018), 138-150, 2018.

550 Yi, S., Chen, J., Qin, Y., Xu, G.: The burying and grazing effects of plateau pika on alpine  
551 grassland are small: a pilot study in a semiarid basin on the Qinghai-Tibet  
552 Plateau, *Biogeosciences*, 13(22), 6273-6284, 2016.

553 Yi, S., Li, N., Xiang, B., Wang, X., Ye, B., Mcguire, A.D.: Representing the effects of alpine  
554 grassland vegetation cover on the simulation of soil thermal dynamics by ecosystem  
555 models applied to the Qinghai-Tibetan Plateau, *J. Geophys. Res. Biogeosciences*, 118 (3),  
556 1186-1199, 2013.

557 Yi, S., Wang, X., Qin, Y., Xiang, B., Ding, Y.: Responses of alpine grassland on  
558 Qinghai-Tibetan plateau to climate warming and permafrost degradation: a modeling  
559 perspective, *Environ. Res. Lett.*, 9(7), 074014, 2014.

560 Yi, S., Zhou, Z., Ren, S., Xu, M., Qin, Y., Chen, S., Ye, B.: Effects of permafrost degradation  
561 on alpine grassland in a semi-arid basin on the Qinghai-Tibetan Plateau, *Environ. Res.*  
562 *Lett.*, 6(4), 045403, 2011.

563 You, Q., Xue, X., Peng, F., Dong, S., Gao, Y.: Surface water and heat exchange comparison  
564 between alpine meadow and bare land in a permafrost region of the Tibetan Plateau, *Agr.*  
565 *Forest. Meteorol.*, 232, 48-65, 2017.

566 Yuste, J.C., Janssens, I.A., Carrara, A., Meiresonne, L., Ceulemans, R.: Interactive effects of  
567 temperature and precipitation on soil respiration in a temperate maritime pine forest,  
568 *Tree Physiol.*, 23, 1263-1270, 2003.

569 Zhang, T., Wang, G., Yang, Y., Mao, T., Chen, X.: Grassland types and season-dependent  
570 response of ecosystem respiration to experimental warming in a permafrost region in the  
571 tibetan plateau, *Agr. Forest. Meteorol.*, 247, 271-279, 2017.

572 Zhang, Y., Dong, S., Gao, Q., Liu, S., Liang, Y., Cao, X.: Responses of alpine vegetation and  
573 soils to the disturbance of plateau pika (*Ochotona curzoniae*) at burrow level on the  
574 Qinghai-Tibetan Plateau of China, *Ecol. Eng.*, 88, 232-236, 2016.

575 Zhang, Z., Dong, Z.: Characteristics of aeolian sediment transport over different land surfaces  
576 in northern China, *Soil Tillage Res.*, 143, 106-115, 2014.

577 **Table 1.** ANOVA results of the effect of patches fragmentation and small mammal  
 578 activities on soil temperature, soil moisture and ecosystem respiration.

|          | Soil temperature |        |        | Soil moisture |         |        | Ecosystem respiration |        |        |
|----------|------------------|--------|--------|---------------|---------|--------|-----------------------|--------|--------|
|          | June             | July   | August | June          | July    | August | June                  | July   | August |
| <i>F</i> | 8.614            | 10.955 | 1.806  | 387.472       | 210.878 | 97.060 | 5.270                 | 10.447 | 8.855  |
| <i>P</i> | <0.001           | <0.001 | 0.106  | <0.001        | <0.001  | <0.001 | 0.001                 | <0.001 | <0.001 |

579 **Table 2.** ANOVA results of the effect of patches fragmentation and small mammal activities  
 580 on **soil compactness**, aboveground biomass, belowground biomass, soil hydraulic  
 581 conductivity, SOC and TN density.

|          | <b>Soil<br/>compactness</b> | Aboveground<br>biomass | Belowground<br>biomass | Saturated hydraulic<br>conductivity | SOC<br>density | TN<br>density |
|----------|-----------------------------|------------------------|------------------------|-------------------------------------|----------------|---------------|
| <i>F</i> | 81.506                      | 6.193                  | 12.925                 | 2.752                               | 145.942        | 50.567        |
| <i>P</i> | <0.001                      | 0.002                  | <0.001                 | 0.027                               | <0.001         | <0.001        |

582

583 **Figure legends**

584 **Figure 1.** An aerial photo of field observation of ecosystem respiration at six surface types: (1)  
585 Large bald patch (LP), (2) Medium bald patch (MP), (3) Small bald patch (SP), (4) Intact  
586 grassland patch (IG), (5) above pika tunnel (PT) and (6) old Pika pile (PP).

587 **Figure 2.** Ecosystem respiration of different surface types: (1) large bald patch (LP), (2)  
588 medium bald patch (MP), (3) small bald patch (SP), (4) intact grassland patch (IG), (5) above  
589 pika tunnel (PT) and (6) old pika pile (PP).

590 **Figure 3.** Daily average air temperature and precipitation of the study site in 2016.

591 **Figure 4.** Monthly average soil temperature and soil moisture under different surface types:  
592 (1) large bald patch (LP), (2) medium bald patch (MP), (3) small bald patch (SP), (4) intact  
593 grassland patch (IG), (5) above pika tunnel (PT) and (6) old pika pile (PP).

594 **Figure 5.** Soil saturated hydraulic conductivity (SHC) under different surface types: (1) large  
595 bald patch (LP), (2) medium bald patch (MP), (3) small bald patch (SP), (4) intact grassland  
596 patch (IG), (5) above pika tunnel (PT) and (6) old pika pile (PP).

597 **Figure 6.** Soil compactness under different surface types: (1) large bald patch (LP), (2)  
598 medium bald patch (MP), (3) small bald patch (SP), (4) intact grassland patch (IG), (5) above  
599 pika tunnel (PT) and (6) old pika pile (PP).

600 **Figure 7.** Soil organic carbon (SOC) (a) and total nitrogen (TN) (b) density of different  
601 surface types: (1) large bald patch (LP), (2) medium bald patch (MP), (3) small bald patch  
602 (SP), (4) intact grassland patch (IG), (5) above pika tunnel (PT) and (6) old pika pile (PP).

603 **Figure 8.** Aboveground biomass (AGB) (a) and belowground biomass (BGB) (b) under  
604 different surface types: (1) large bald patch (LP), (2) medium bald patch (MP), (3) small bald  
605 patch (SP), (4) intact grassland patch (IG), (5) above pika tunnel (PT) and (6) old pika pile  
606 (PP).

607 **Figure 9.** The correlation coefficient charts between ecosystem respiration (Re) and biotic  
608 and abiotic factors for all six land surfaces. The diagonal line in the figure shows the  
609 distributions of the variables themselves. The lower triangle (the left bottom of the diagonal)  
610 in the figure shows scatter plots of the two properties. The upper triangle (the upper right of  
611 the diagonal) in the figure indicates the correlation values of the two parameters; the asterisk  
612 indicates the degree of significance (\*\*\*) indicates significant differences at  $P < 0.001$ , \*



- 613 indicates significant differences at  $P < 0.01$ , \* indicates significant differences at  $P < 0.05$ ).
- 614 The bold bigger numbers mean the higher correlation.

615 **Figure 1.**

616

617

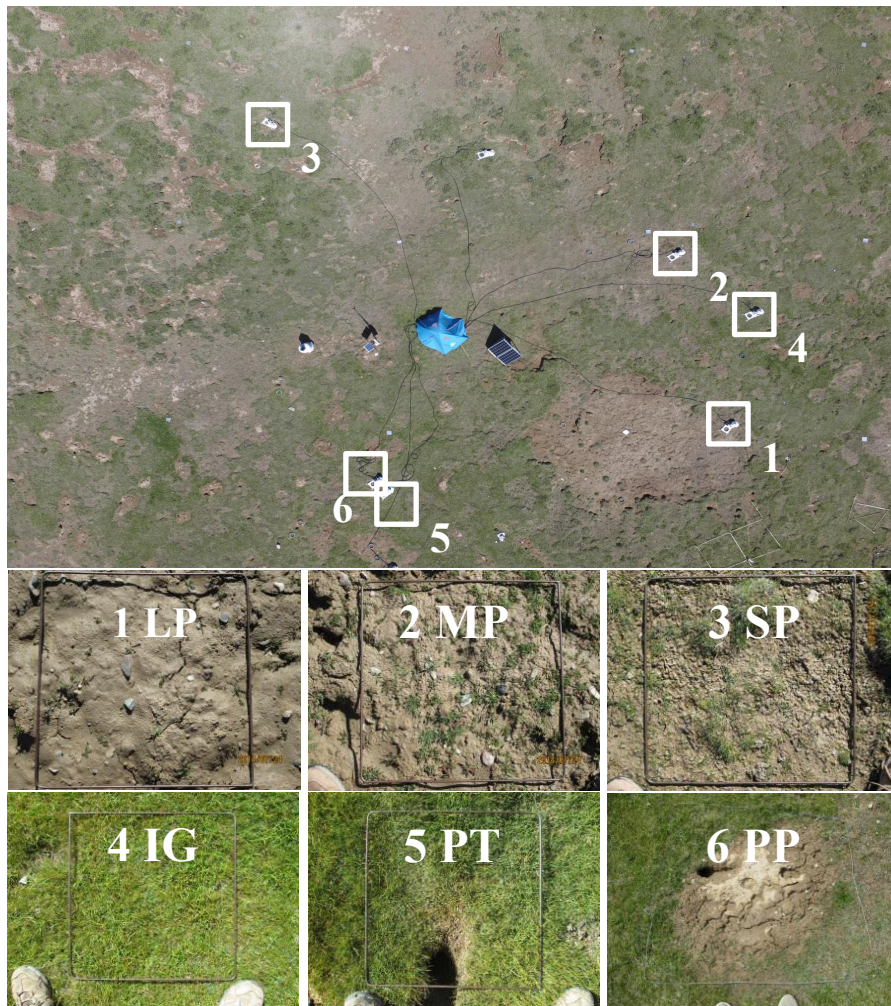

618 **Figure 2.**

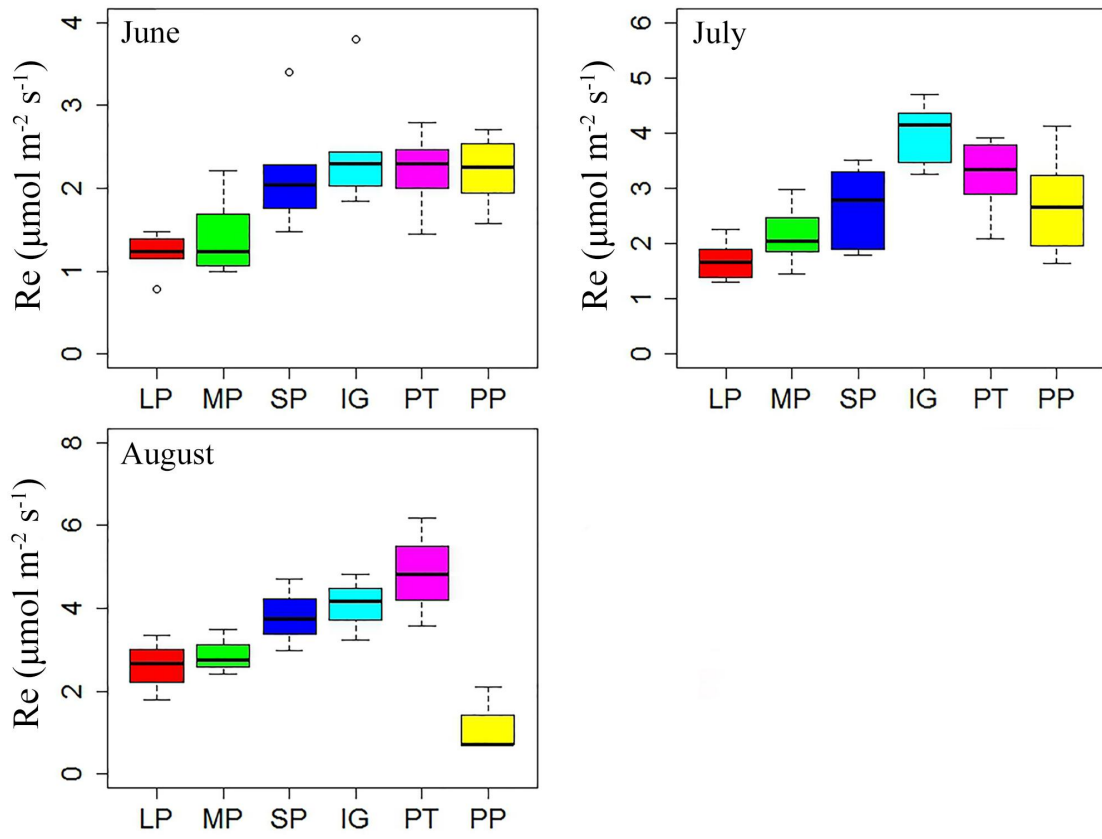

619

620

621

622 **Figure 3.**

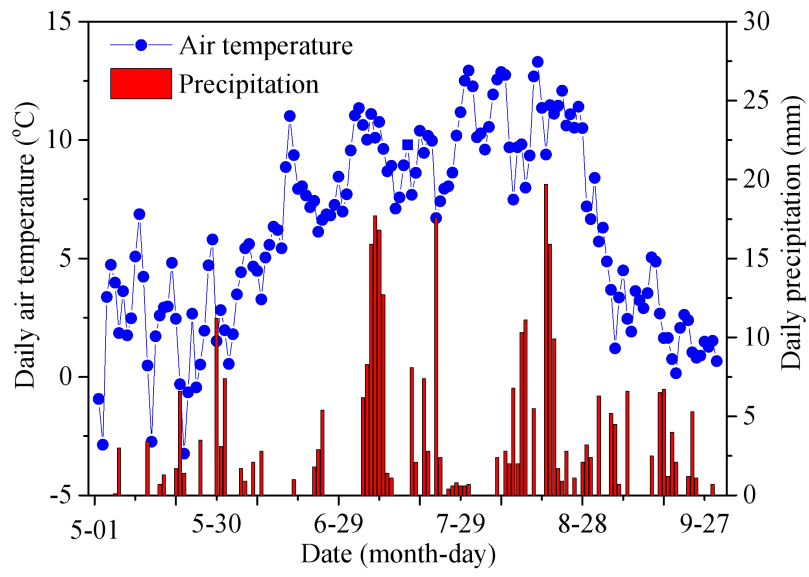

623

624

625 **Figure 4.**

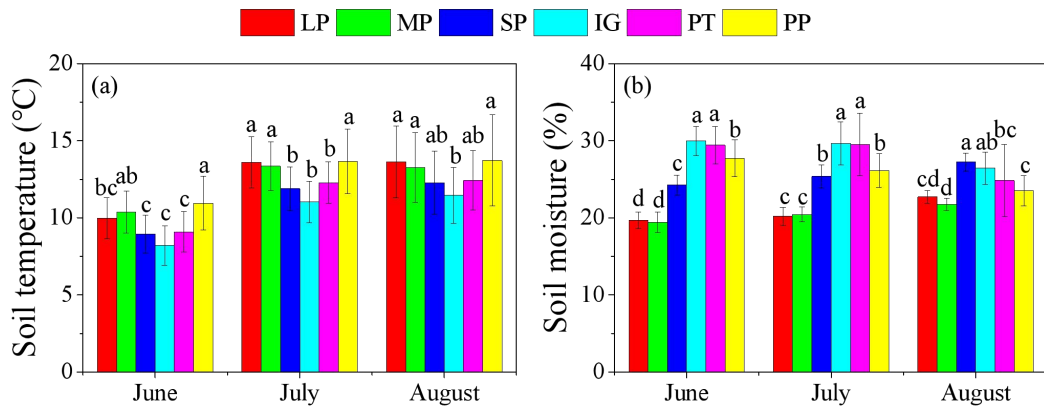

626

627

628

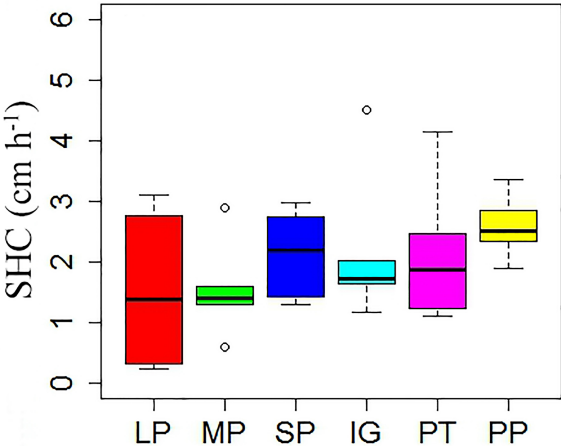

631 **Figure 6.**

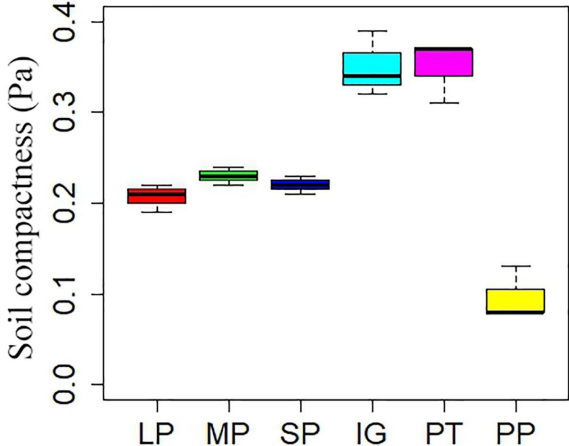

632

633 **Figure 7.**

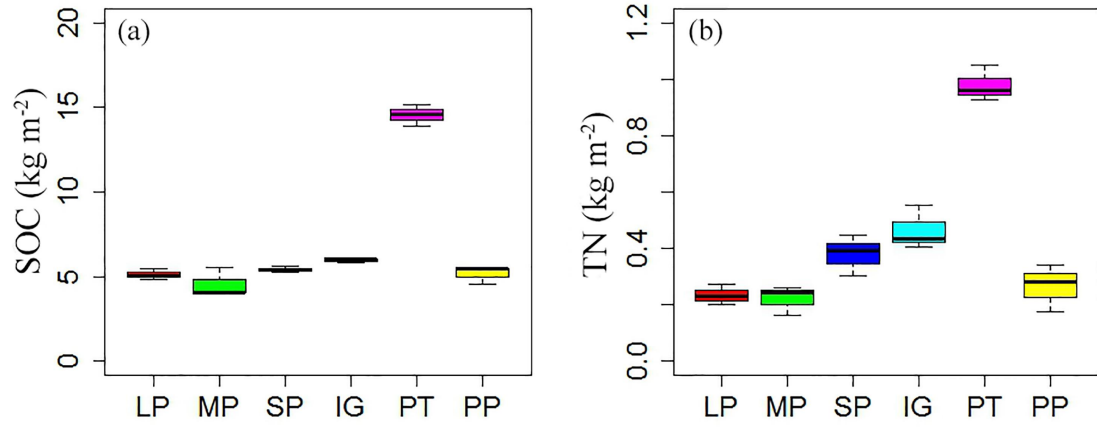

634



**Figure 8.**

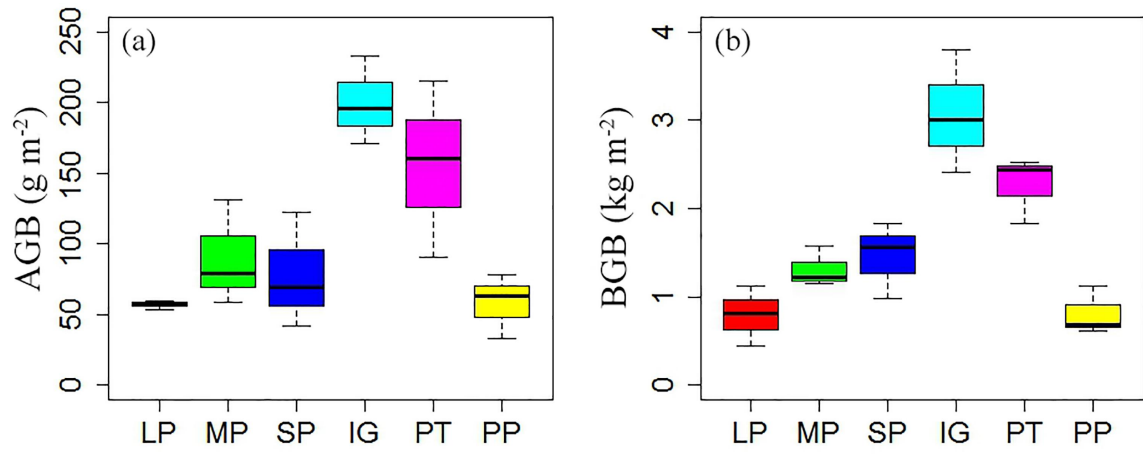

Figure 9.

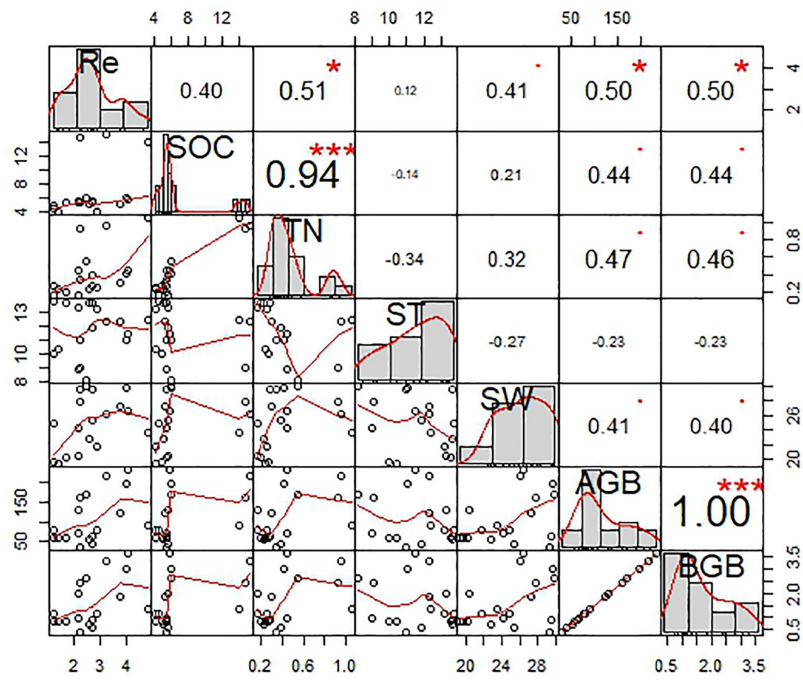

Supplement: Supplementary file [file bg-2018-296-AC5-supplement.pdf]
